# Supplementary material
Source: PubMed Central journal article supplement (PMC2903424)

### Supplementary materials:

**Figure S1. Expression of *PTTG1* in normal fibroblasts.** (A) The recombinant 6xHis-PTTG1 protein was expressed in *E. coli* BL21/plysS cells harboring plasmid pET6H-PTTG1 and then isolated using Ni-NTA agarose beads (Qiagen). Two  $\mu\text{g}$  of the purified PTTG1 was analyzed by 10% SDS-PAGE and stained with Coomassie blue. (B) Preparation of polyclonal antibodies against PTTG1. The purified recombinant PTTG1 was used to generate antibodies from rabbit. Ten  $\mu\text{g}$  of H1299 cell extracts were separated by 10% SDS-PAGE and then analyzed by immunoblotting using rabbit polyclonal antibodies against PTTG1 generated from recombinant PTTG1. (C) IMR90 cells were infected with an adenovirus carrying the *PTTG1* gene using indicated the M.O.I. values for 2 days (upper panel). Total cell extracts were prepared, separated by 10% SDS-PAGE and then subjected to immunoblotting analysis using polyclonal antibodies against PTTG1. Adenovirus-carrying *PTTG1* was infected with IMR90 cells at an M.O.I. equivalent to 20. Cell extracts were prepared at the indicated time points and then analyzed (lower panel). Mock indicates experiments without virus infections.

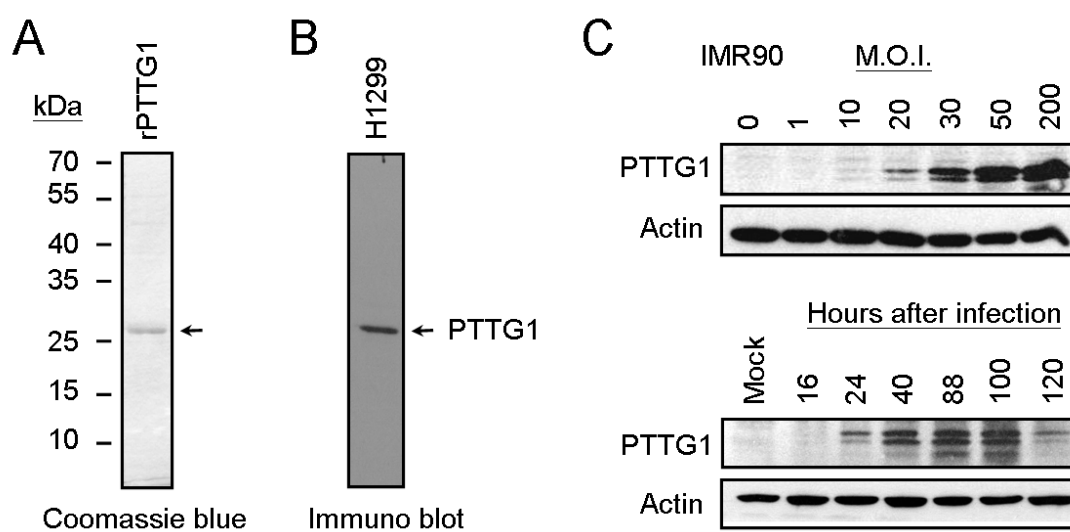

Supplement: supp_M109.096255_jbc.M109.096255-1.pdf [file supp_M109.096255_jbc.M109.096255-1.pdf]
